# Supplementary material
Source: Springer Nature journal article supplement (https://www.springermedizin.de/resource/supplementary/13024_2013_521_MOESM8_ESM.pdf/9644394)

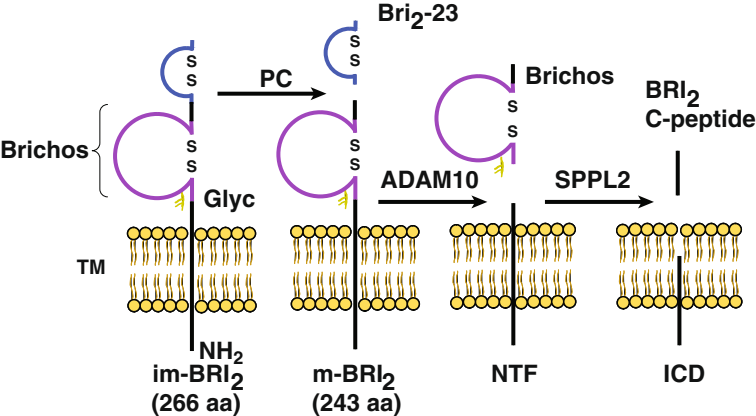

Supplement: MOESM8 [file 9644394]
